# Supplementary material for: Heavy chain-1 of inter-α-inhibitor has an integrin-like structure with immune regulatory activities
Source: bioRxiv or medRxiv preprint supplement (doi:10.1101/695700), 2019-07-08

**A**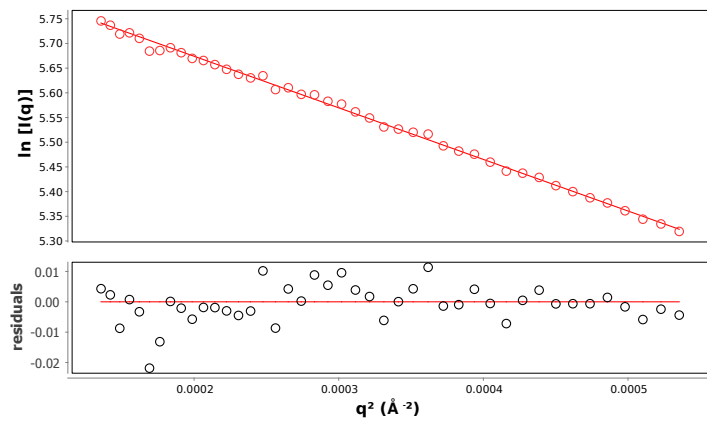**B**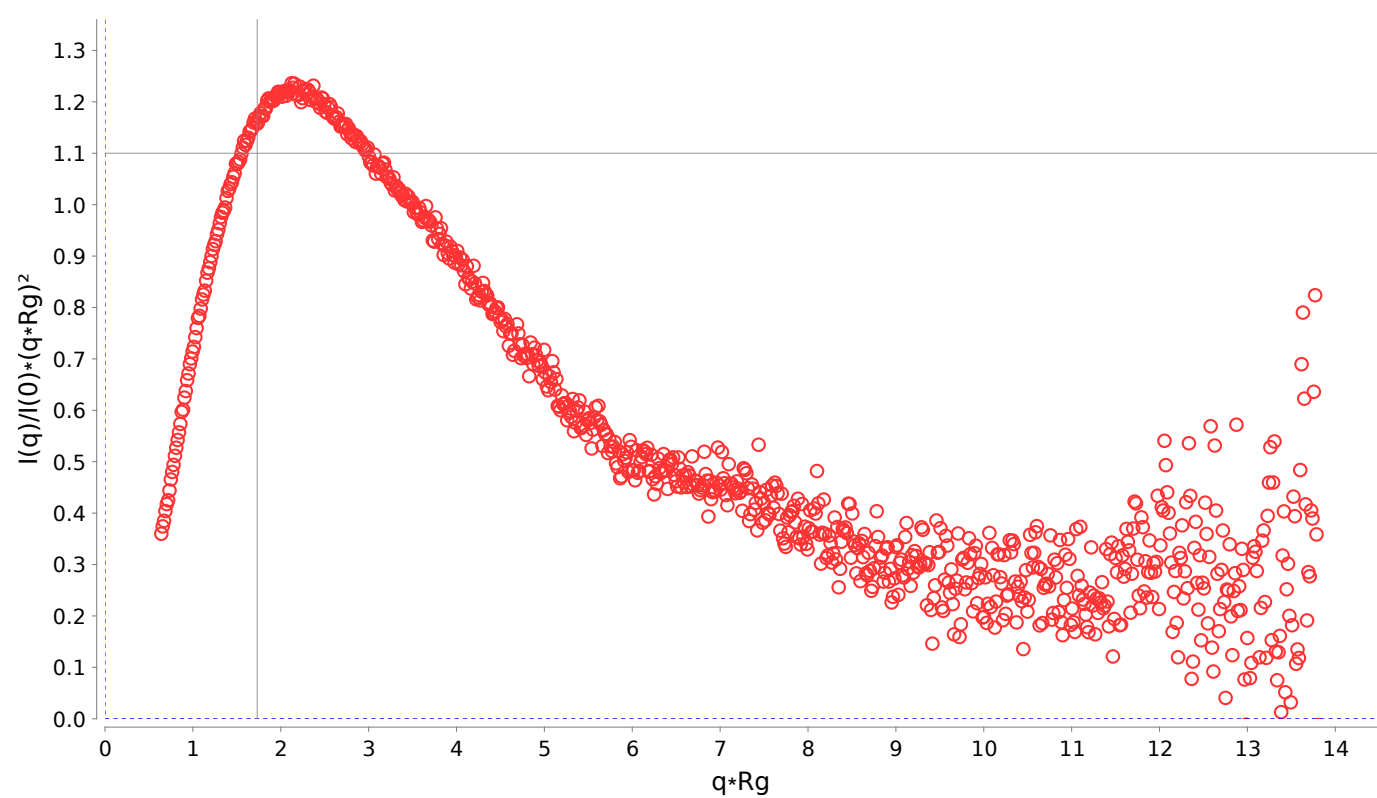**C**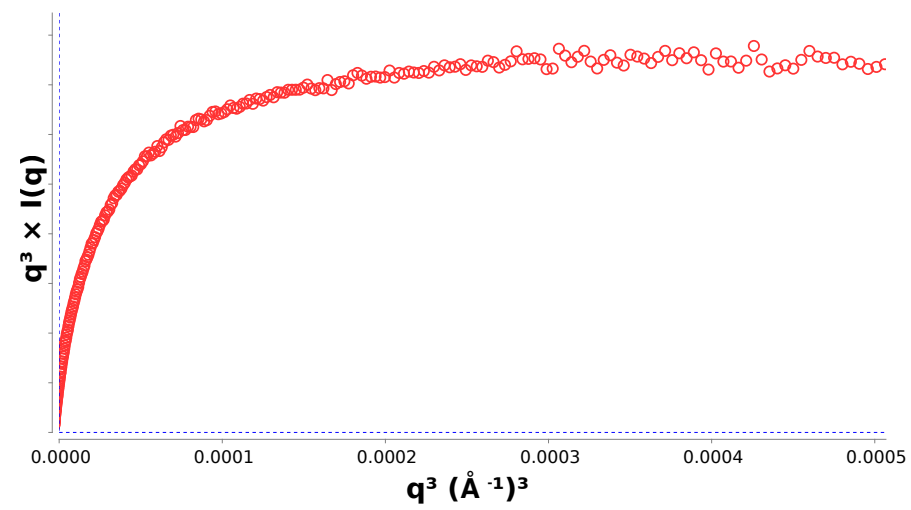**D**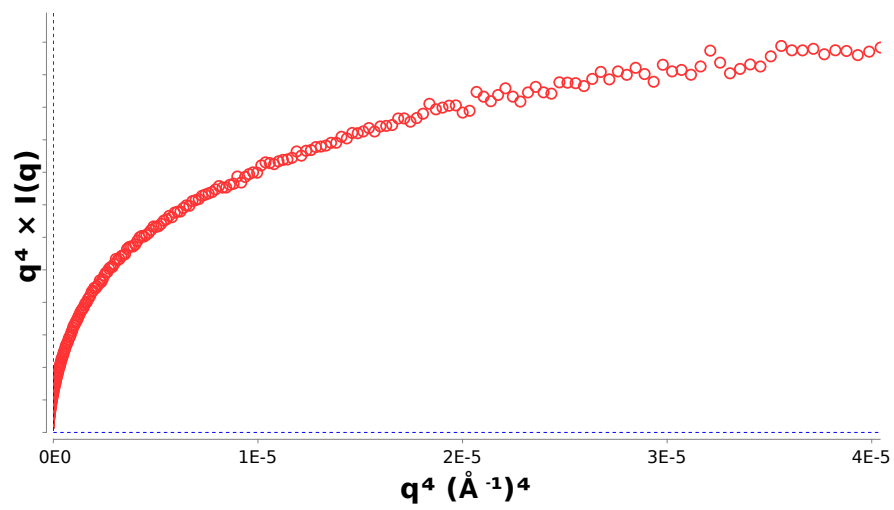

Supplement: Supplementary file [file media-5.pdf]
